# Supplementary material for: Selective dependency of CALR-mutant myeloproliferative neoplasms on TYK2 signaling
Source: Research Square preprint supplement (doi:10.21203/rs.3.rs-8425696/v1), 2026-01-07
Supplement: Supplementary file 1 [file 8f4864fdcbc8da4a91dca3cf.docx]

**Selective dependency of CALR-mutant myeloproliferative neoplasms on TYK2 signaling**

Milena Kalmer1,2,3,4,5, Chiara Wirths1,2,3, Rebecca Lemanzyk1,2,3, Alessia Piergentili6,7,8,Bärbel Junge1,2, Jonas Goßen6,7, Siddharth Gupta1,2, Laura Schulz1,2, Anna Spitzer1,2, Stefan Tillmann1,2, Kim Kricheldorf1,2, Joelle Schifflers1,2, Kristina Pannen1,2, Angela Galauner1,2, Christian Pecquet6, Marcelo A. S. de Toledo1,2, Stefan N. Constantinescu4,5,9,10, Giulia Rossetti6,8,11, Steffen Koschmieder1,2,12, Nicolas Chatain1,2,12

**1** Department of Hematology, Oncology, Hemostaseology, and Stem Cell Transplantation, Faculty of Medicine, RWTH Aachen University, Pauwelsstraße 30, 52074 Aachen, Germany; **2** Center for Integrated Oncology Aachen Bonn Cologne Düsseldorf (CIO ABCD), Aachen, Germany; **3** shared first authors; 4 Signal Transduction and Molecular Hematology Unit (SIGN), de Duve Institute, Ludwig Institute for Cancer Research, Brussels, Belgium; 5 Ludwig Institute for Cancer Research, Brussels, Belgium; **6** Institute for Computational Biomedicine (INM-9/IAS-5) Forschungszentrum Jülich, Wilhelm-Johnen-Straße, 52428 Jülich, Germany; **7**Faculty of Mathematics, Computer Science and Natural Sciences RWTH Aachen University, Aachen, Germany; **8** Department of Neurology University Hospital Aachen, RWTH Aachen University, Aachen, Germany; 9 WEL Research Institute, WELBIO Department, Wavre, Belgium; 10 Nuffield Department of Medicine, Ludwig Institute for Cancer Research, Oxford University, Oxford, United Kingdom; 11 Jülich Supercomputing Centre (JSC) Forschungszentrum Jülich, Jülich, Germany; 12 shared last authors

Correspondence:

Priv.-Doz. Dr. rer. nat. Nicolas Chatain, Department of Hematology, Oncology, Hemostaseology, and Stem Cell Transplantation, Faculty of Medicine, RWTH Aachen University, Pauwelsstr. 30, Aachen, Germany.

Phone: +49-241-8037798

E-mail: nchatain@ukaachen.de

Supplementary information

Supplementary Methods

Primary patient samples

Peripheral blood samples from MPN patients were obtained from the Department of Hematology, Oncology, Hemostaseology and Stem Cell Transplantation at RWTH Aachen University Hospital after patients’ written informed consent, as approved by the local ethics committee (EK 127/12). Healthy control samples were obtained from the Department of Transfusion medicine at RWTH Aachen University Hospital after written informed consent (EK099/14). Peripheral blood mononuclear cells (PBMCs) were isolated using density gradient centrifugation with Ficoll-Paque Premium (GE Healthcare, Chicago, Illinois, USA) or Pancoll (Pan-Biotech GmbH, Aidenbach, Germany). See Table S1 for patients information.

CRISPR/Cas9 targeting of TYK2

The TYK2 gene was targeted in 32DMPL JAK2V617F and CALRdel52 cells using the Alt-R CRISPR/Cas9 system (IDT, Leuven, Belgium). Two strategies were applied: for CRISPR strategy 1, two guides, targeting sequences in exon 4 and 5, were combined with a CRISPR/Cas9 nuclease, inducing double-strand breaks (Additional File 1, Table S3). For strategy 2, four guides, binding in exon 6 and the following intron, were combined with a CRISPR/Cas9 nickase, inducing four single strand breaks in exon 4 as well as in the following intron of TYK2. CRISPR/Cas9 enzyme and gRNA complex were electroporated into the cells using the Neon Transfection System (ThermoFisher Scientific; 3 pulses, 1500 V, 10 ms) or the 4D Amaxa Nucleofector (Lonza, Cologne, Germany) according to the manufacturer’s protocol. Single cell dilutions were performed from the electroporated cell bulk, and single clones were screened by Sanger sequencing using specific PCRs to amplify the targeted region using gDNA and cDNA (primers listed in Additional File 1, Table S5). For strategy 2, a 400 bp product was expected in case of a successful TYK2 gene alteration (Figure S2 C, D). A PCR product of around 1000 bp indicated a wildtype (WT) allele. The resulting clones were compared to their parental bulk (P).

Colony formation unit (CFU) assay and calculation of clonogenic VAF

For CFU assays of PV and ET patient material, 106 PBMCs/ml were added to 3.5 ml methylcellulose (Methocult; 80 ml; H4230, Stemcell Technologies, Vancouver, Canada) supplemented with 20 ml IMDM (Thermo Fisher Scientific), 17.5 µl ciprofloxacin, 50 ng/ml human stem cell factor (SCF), 10 ng/ml human granulocyte-macrophage colony-stimulating factor (GM–SCF), 10 ng/ml human IL-3, 14 ng/ml human erythropoietin (EPO) (Immunotools, Friesoythe, Germany) and with or without 1 µM deucravacitinib. For PMF patients, 3 x 105 cells/ml were used. Cell suspensions were plated on 35 x 10 mm cell culture dishes in triplicates. Colonies on each dish were counted after 10-13 days. Of 4 JAK2V617F- and 4 CALRdel52-mutated patient samples used for the CFU assays, 30 colonies each were picked for genotyping. Cells were lysed in RLT buffer (Qiagen) and DNA was isolated using Monarch PCR and DNA Cleanup Kit (New England Biolabs) followed by a PCR specific for the respective driver mutation (primers are listed in Additional File 1, Table S2). Next, mutant allele burden was calculated.

Cloning cDNA into TOPO vector for sequencing

RNA isolation of CRISPR-edited clones and transcription into cDNA was performed as previously described 1. Specific primers (Supplementary Table S4,) were used to amplify the altered region by PCR. PCR product was purified and cloned into TOPO vector according to the instruction of TOPO TA Cloning Kit (ThermoFisher Scientific). The cloned fragments were amplified and analyzed by Sanger-sequencing.

Cell Viability Assay with induced pluripotent stem cells (iPSC)-derived hematopoietic stem and progenitor cells (HSPC)

iPSC-derived CD34+ cells were seeded in SFM + cytokines (medium composition see Supplementary information) at a density of 10,000 cells per well in a 96-well flat bottom plate (Greiner) and treated with 0.05% DMSO, 0.5 μM, 1 μM and 5 μM of deucravacitinib for 72 h. For assessing cell viability, 100 μL of CellTiter-Glo® reagent (Promega, Walldorf, Germany) was added to each well and gently mixed on a mini shaker at 300 rpm for 5 min to induce cell lysis, and luminescence was measured in a microplate reader (SpectraMax® i3).

Serum free medium (SFM)* for the iPSC-derived CD34+ cell culture.

| **Component** | **Final concentration** | **Cat#** | **Manufacturer** |
| --- | --- | --- | --- |
| IMDM | 50% | 12440-053 | Gibco |
| Ham’s F-12 Nutrient mix | 50% | 11765-054 | Gibco |
| Human albumin (Albutein 200 g/L) | 0.5% | 17910338 | Grifols |
| GlutaMAX | 2 mM | 15140-130 | Gibco |
| Chem. defined Lipids | 2 mM | 11905-031 | Gibco |
| 1-Thioglycerol | 400 μM | M1753 | Sigma Aldrich |

*supplemented with 10 ng/mL SCF, 5 ng/mL FLT3-L, 2 ng/mL IL-3 and 2 ng/mL hyper IL-6

Modeling

The human TYK2 FERM-SH2 domains (PDB ID: 4PO6) and the human JAK2 FERM-SH2 domains (PDB ID: 6E2Q) were modeled in complex with the intracellular region of TPOR. TPOR sequence was aligned to the corresponding region of the erythropoietin receptor (EPOR) using T-Coffee for multiple sequence alignment 2.

Contact restraints were extracted from the crystal structure of the human JAK2 in complex with EPOR (PDB ID: 6E2Q) to guide the positioning and orientation of TPOR relative to hTYK2. Comparative modeling was performed using MODELLER 3. A set of models was generated, and the best-scoring pose was selected for the molecular dynamics simulations based on the DOPE score computed by MODELLER. In addition, model of TYK2 carrying deletion 158-223 in complex with TPOR was built with MODELLER.

Molecular dynamics (MD) Simulations

MD simulations were performed by using GROMACS 2021.4 with AMBER99sb-ildnp force field 4,5. The systems were placed in an octahedral box filled with TIP3P water model at the physiological concentration of 0.15 M 6. Periodic boundary conditions were applied. The energy of all systems was minimized for 5000 steps by using the steepest descent algorithm with restraint of 1000kJ·mol-1·nm-2 followed by 1000 steps by the conjugate gradient algorithm without restraints. Initial velocities were assigned according to Maxwell-Boltzmann distribution. The systems were gradually heated from 0 to 310 in NVT ensemble for 5 ns by using the V-rescale algorithm and equilibrated to the correct density of 1 bar with 1 ns simulation in NPT ensemble by using the isotropic Parrinello-Rahman barostat 7,8. 500-ns long production runs were carried out in the NPT ensemble for the JAK2 WT, TYK2 WT and TYK2 del158-223 systems. The Particle Mesh-Ewald (PME) method was used to compute the long-range interactions with a cut-off of 1.2 nm. An equal cut-off was used for the short-range Van der Waals and electrostatic interactions. Hydrogen bond lengths were constrained by LINCS algorithm 9.

The analysis of hydrogen bonds was performed using the gmx hbond of GROMACS, adopting a donor–acceptor atoms distance cutoff of 0.35 nm and a donor–hydrogen–acceptor angle cutoff of 30°.

The prediction of the binding free energy estimates between TYK2 and TPOR were computed using the gmx_MMPBSA tool 10. The total binding free energy (ΔG bind) was computed as the sum of the gas-phase interaction energy (electrostatics and van der Waals) and the solvation free energy (polar and nonpolar contributions). Predicted binding affinities should be interpreted with caution, as they provide qualitative rather than quantitative estimates of interaction strength.

**Supplementary Material**

**Supplementary Table S1: Peripheral blood samples**

| **Sample** | **Sex** | **Disease entity** | **Age** | **Driver mutation  (VAF in %)** | **Additional mutations** |
| --- | --- | --- | --- | --- | --- |
| 1 | male | ET | 73 | JAK2V617F (21%) | none |
| 2 | female | ET | 34 | CALRdel52 (10%) | none |
| 3 | female | ET | 46 | CALRdel52 (35%) | none |
| 4 | female | ET | 44 | JAK2V617F (22%) | none |
| 5 | female | Pre-MF | 57 | CALRdel52 (72%) | none |
| 6 | male | ET | 59 | JAK2V617F (17%) | none |
| 7 | male | PMF | 57 | JAK2V617F (89%) | none |
| 8 | male | ET | 53 | CALRdel52 (56%) | none |
| 9 | male | PMF | 60 | JAK2V617F (51%) | ASXL1, DNMT3A, U2AF1 |
| 10 | male | PMF | 69 | JAK2V617F (75%) | ASXL1 |
| 11 | male | PV | 62 | JAK2V617F (91%) | none |
| 12 | female | PV | 45 | JAK2V617F (55%) | none |
| 13 | Male | PV/PreMF | 43 | JAK2V617F (33%) | none |
| 14 | female | PV | 47 | JAK2V617F (21%) | none |
| 15 | female | Pre-MF | 57 | CALRins5 (20%) | none |
| 16 | male | PMF | 65 | CALRins5 (32%) | none |
| 17 | female | ET | 59 | CALRins5 (30%) | none |
| 18 | male | ET | 32 | CALRins5 (42%) | none |
| 19 | male | ET | 60 | JAK2V617F (35%) | none |
| 20 | female | Pre-MF | 51 | JAK2V617F (47%) | TET |
| 21 | male | ET | 66 | JAK2V617F (16%) | 14% DNMT3A R882H, 15% TET2 5Bp-Del/3-Bp-Ins (p.Gly223Phefs*30) |
| 22 | male | ET | 53 | CALRdel52 (52%) | none |
| 23 | female | PMF | 34 | CALRdel31 (44%) | none |
| 24 | female | ET | 28 | CALRdel52 (42%) | none |
| 25 | male | Healthy donor | na | nd | nd |
| 26 | male | Healthy donor | na | nd | nd |
| 27 | female | Healthy donor | na | nd | nd |

**Supplementary Table S2: Primers for genotyping CALR/JAK2 WT/V617F**

|  | **forward** | **reverse** |
| --- | --- | --- |
| JAK2 WT | GCATTTGGTTTTAAATTATGGAGTATATG | ATTGCTTTCCTTTTTCACAAGAT |
| JAK2V617F | TCCTCAGAACGTTGATGGCAG | GTTTTACTTACTCTCGTCTCCACAAAA |
| CALR | ACAACTTCCTCATCACCAACG | GGCCTCAGTCCAGCCCTG |

**Supplementary Table S3: Antibodies**

| **Antibody** | **Application** | **Company** |
| --- | --- | --- |
| monoclonal rabbit anti-mouse/human/rat phospho-TYK2 (Y1054/1055) | WB | Cell signaling |
| Monoclonal mouse anti-mouse/human TYK2 (H-4) | WB | Santa Cruz, sc-166686 |
| polyclonal rabbit anti-mouse/human phospho-JAK2 (Tyr1007/1008) | WB | Cell signaling |
| Monoclonal rabbit anti-JAK2 | WB | Cell signaling |
| monoclonal mouse antibody CAL2  (directed against novel C-terminus of CALR mut) | WB | Dianova |
| monoclonal rabbit anti-Calreticulin (D3E6) | WB | Cell signaling |
| polyclonal rabbit anti-mouse/human phospho-STAT1 (Y 701) | WB | Cell signaling |
| polyclonal rabbit anti-mouse/human STAT1 | WB | Cell signaling |
| polyclonal rabbit anti-mouse/human phospho-STAT3 (Y 705) | WB | Cell signaling |
| Monoclonal mouse anti-STAT3 | WB | Cell signaling |
| monoclonal mouse anti-mouse/human GAPDH | WB | Cell signaling |
| Monoclonal mouse anti-mouse TYK2 | WB | Santa Cruz |
| monoclonal mouse anti-α-Tubulin | WB | Sigma |
| polyclonal rabbit anti-mouse/human phospho-STAT5 (Tyr694) | WB | Cell signaling |
| Monoclonal rabbit anti-STAT5 | WB | Cell signaling |
| Polyclonal goat anti-rabbit immunoglobulin HRP | WB | DAKO |
| Polyclonal goat anti-mouse immunoglobulin HRP | WB | DAKO |
| CD110 (MPL)-APC | Flow cytometry | Biolegend |
| CD41/61 | Flow cytometry | BD |

**Supplementary Table S4: CRISPR guides**

| Strategy 1 (CRISPR/Cas9 nuclease) | CTTCGCACTCTACAATGCAC |
| --- | --- |
| ATACCGGTGTGGTTTCCCA |
| Strategy 2 (CRISPR/Cas9 nickase) | ATTTCGTCACCTGATCTCTC |
| TGACGAAATGGAGTGGGACC |
| TAGACGCTTGTGAACTGTAT |
| GAGTTCCTCTTCTGGTACAC |

**Supplementary Table S4: Primers for CRISPR clones**

|  | **forward** | **reverse** |
| --- | --- | --- |
| TYK2 genotyping | CTAGCGAGGAGGAGATCCACC | ATGTGTATTGCCCGGCGGCG |
| TYK2 cDNA | CAGAGACTTCCTCAGACCGG | CATCTGGAGGTCCTGGCACAG |
| **Sequencing** | | |
| Off-target NUS1 | GCAAAGGGAACGTCCTCAGA | CAGGTGCCACTCAAGAGGAG |
| Off-target SYNE4 | TGCTCCAGGTGCTTGAGAAG | CTGATCTCACCTCAAGGCCC |
| Off-target IL3-RA | GACTGACAGGTGGGCGTATC | CCGCTGTGGGGCAAATAAAG |
| Off-target TEF | CCACATGTGTCTGTCTGC | ACCCTGGGAAGAAGGGAAGT |

Bibliography

1 Czech J, Cordua S, Weinbergerova B, Baumeister J, Crepcia A, Han L *et al.* JAK2V617F but not CALR mutations confer increased molecular responses to interferon-α via JAK1/STAT1 activation. *Leukemia* 2019; **33**: 995–1010.

2 Notredame C, Higgins DG, Heringa J. T-Coffee: A novel method for fast and accurate multiple sequence alignment. *J Mol Biol* 2000; **302**: 205–17.

3 Sali A, Blundell TL. Comparative protein modelling by satisfaction of spatial restraints. *J Mol Biol* 1993; **234**: 779–815.

4 Abraham MJ, Murtola T, Schulz R, Páll S, Smith JC, Hess B *et al.* GROMACS: High performance molecular simulations through multi-level parallelism from laptops to supercomputers. *SoftwareX* 2015; **1**–**2**: 19–25.

5 Lindorff-Larsen K, Piana S, Palmo K, Maragakis P, Klepeis JL, Dror RO *et al.* Improved side-chain torsion potentials for the Amber ff99SB protein force field. *Proteins* 2010; **78**: 1950–8.

6 Jorgensen WL, Chandrasekhar J, Madura JD, Impey RW, Klein ML. Comparison of simple potential functions for simulating liquid water. *J Chem Phys* 1983; **79**: 926–935.

7 Bussi G, Donadio D, Parrinello M. Canonical sampling through velocity rescaling. *J Chem Phys* 2007; **126**: 014101.

8 Parrinello M, Rahman A. Polymorphic transitions in single crystals: A new molecular dynamics method. *J Appl Phys* 1981; **52**: 7182–7190.

9 Hess B, Bekker H, Berendsen HJC, Fraaije JGEM. LINCS: A linear constraint solver for molecular simulations. *J Comput Chem* 1997; **18**: 1463–1472.

10 Valdés-Tresanco MS, Valdés-Tresanco ME, Valiente PA, Moreno E. gmx_MMPBSA: A New Tool to Perform End-State Free Energy Calculations with GROMACS. *J Chem Theory Comput* 2021; **17**: 6281–6291.
